# Supplementary material
Source: PubMed Central journal article supplement (PMC6052077)

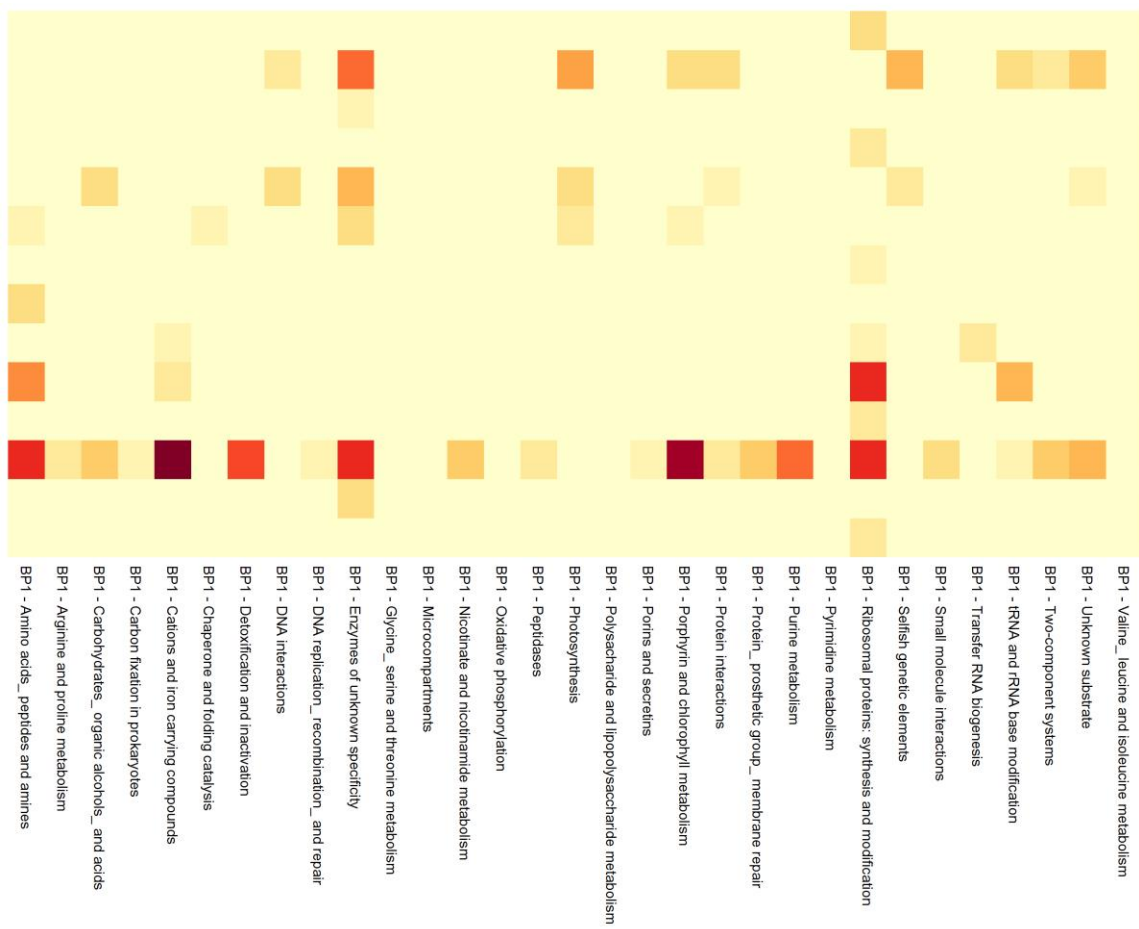

Meio - Alanine\_ aspartate and glutamate metabolism  
 Meio - Amino acids\_ peptides and amines  
 Meio - Anions  
 Meio - Bacteriophage and virus functions  
 Meio - Carbohydrates\_ organic alcohols\_ and acids  
 Meio - Cations and iron carrying compounds  
 Meio - Cysteine and methionine metabolism  
 Meio - DNA interactions  
 Meio - DNA replication\_ recombination\_ and repair  
 Meio - Enzymes of unknown specificity  
 Meio - Oxidative phosphorylation  
 Meio - Ribosomal proteins: synthesis and modification  
 Meio - Transfer RNA biogenesis  
 Meio - Unknown substrate

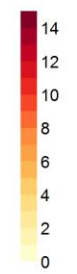

Supplement: 41396_2018_145_MOESM4_ESM.pdf [file 41396_2018_145_MOESM4_ESM.pdf]
