# Supplementary material
Source: PubMed Central journal article supplement (PMC6052077)

Full network of 38778 edges

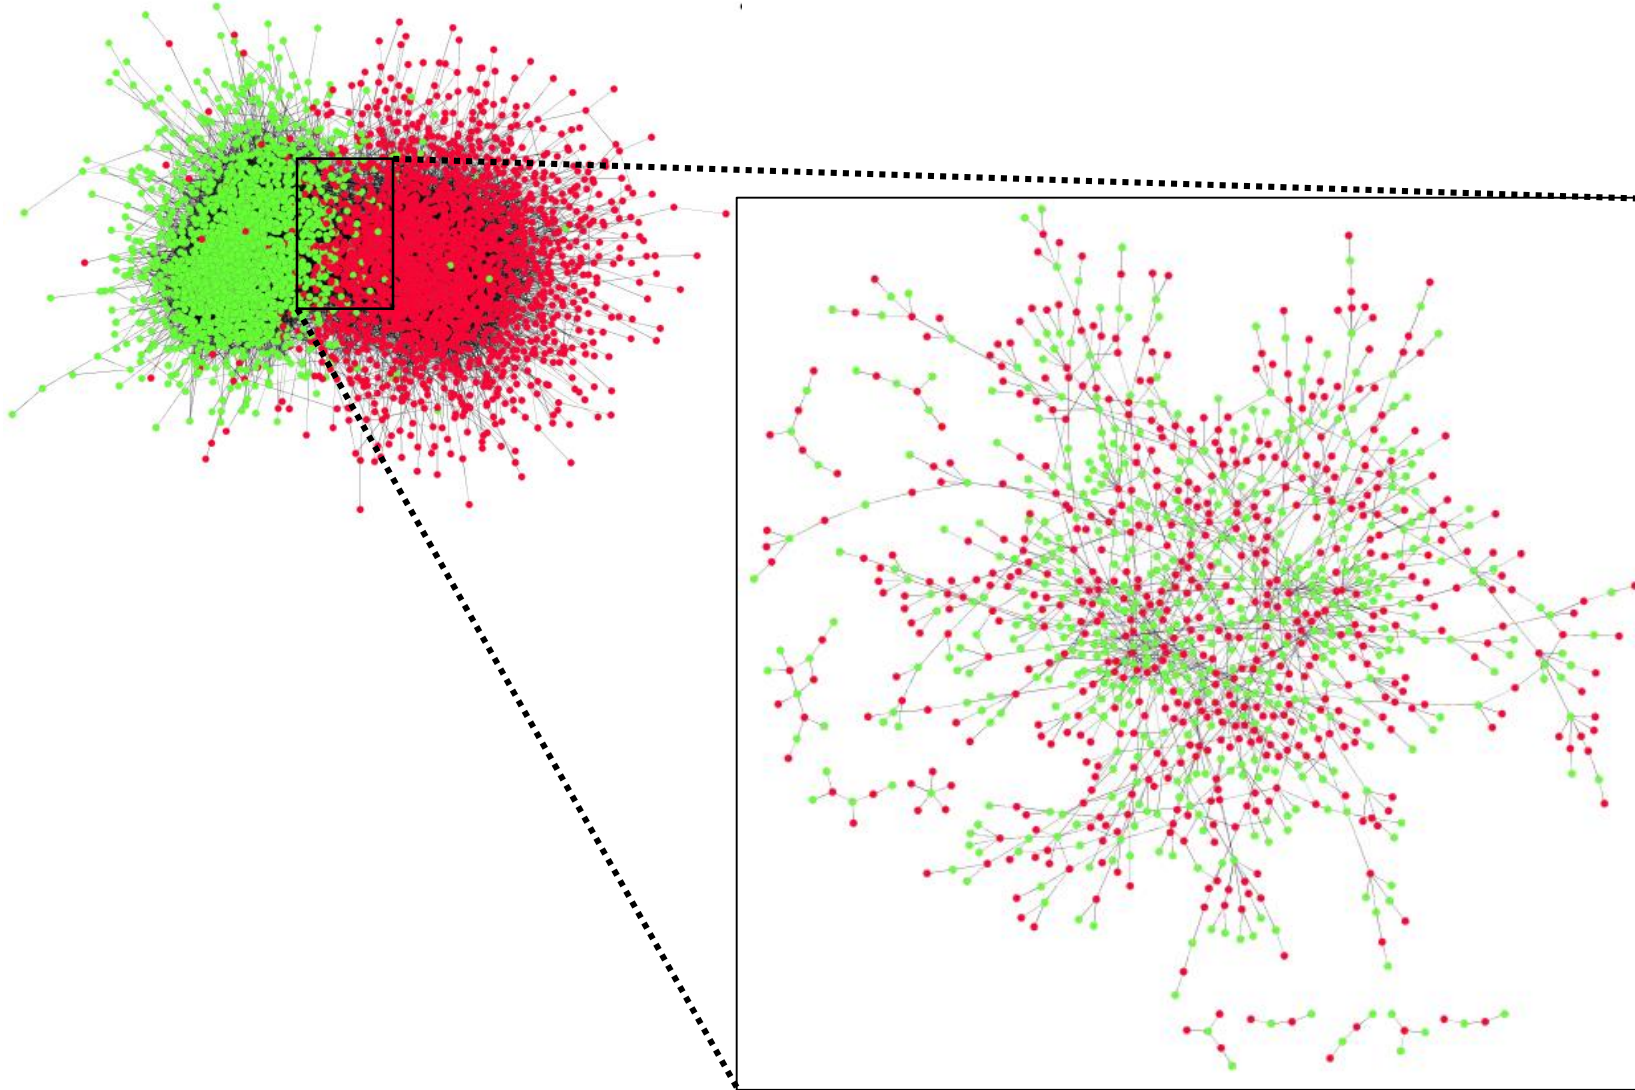

Extracted subnetwork of only 1396 cross-species edges

**Supplemental Figure 1**

Supplement: 41396_2018_145_MOESM1_ESM.pdf [file 41396_2018_145_MOESM1_ESM.pdf]

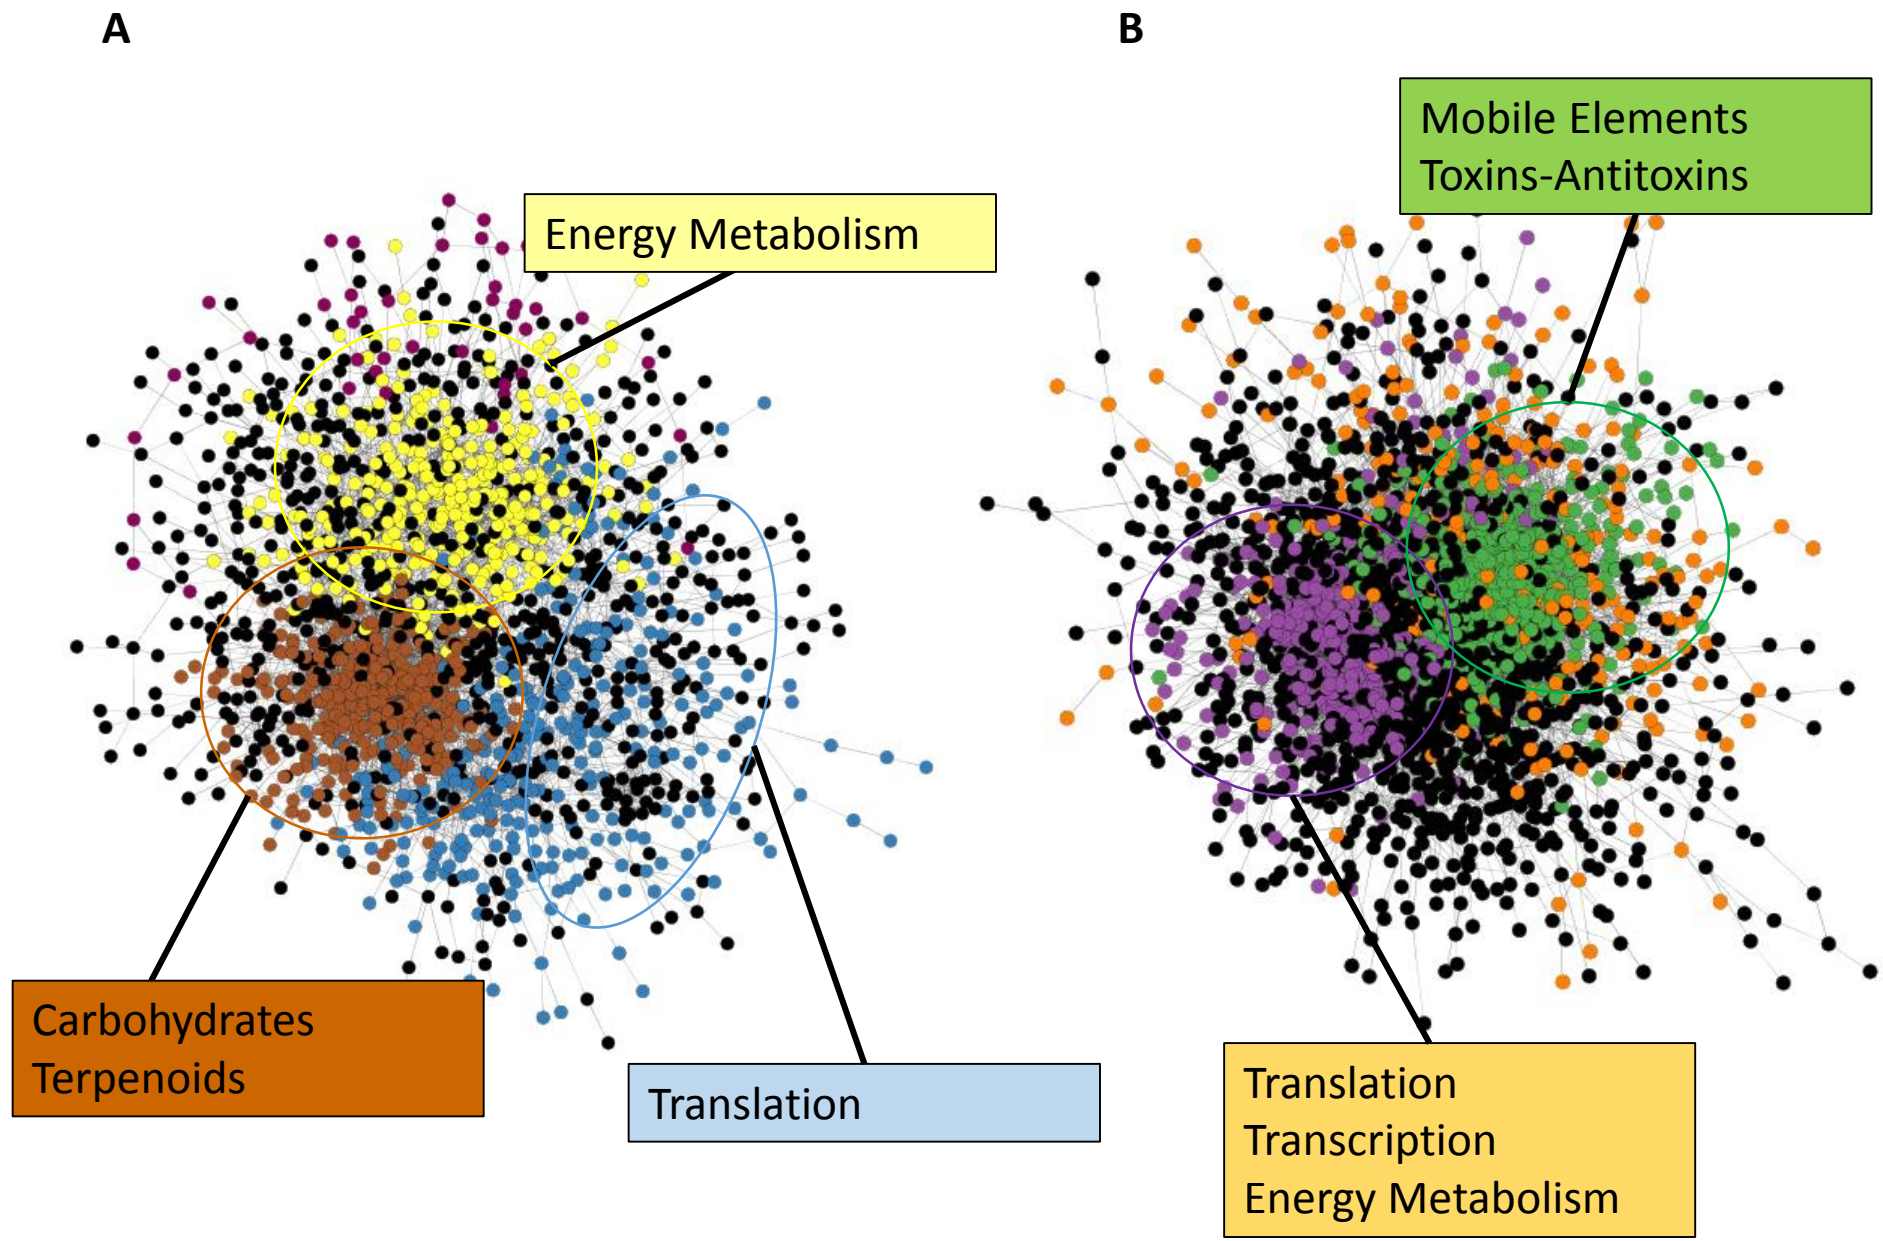

Supplemental Figure 2

Supplement: 41396_2018_145_MOESM2_ESM.pdf [file 41396_2018_145_MOESM2_ESM.pdf]

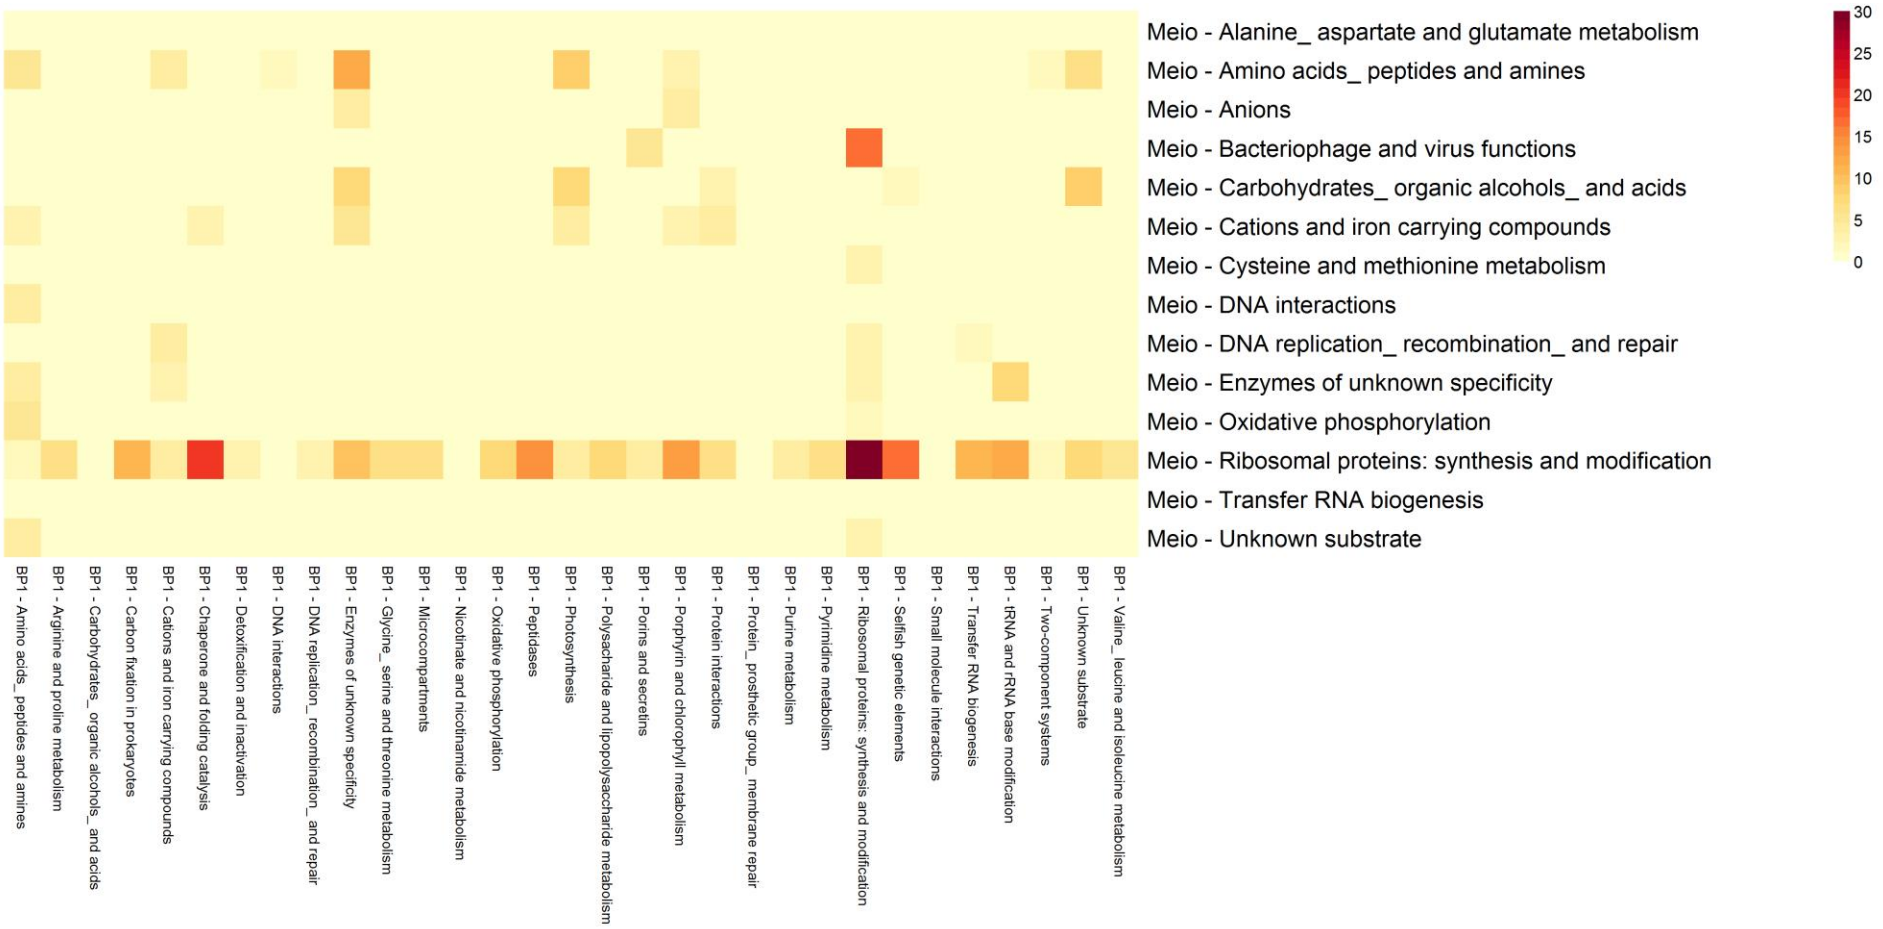

Supplementary Figure 3

Supplement: 41396_2018_145_MOESM3_ESM.pdf [file 41396_2018_145_MOESM3_ESM.pdf]

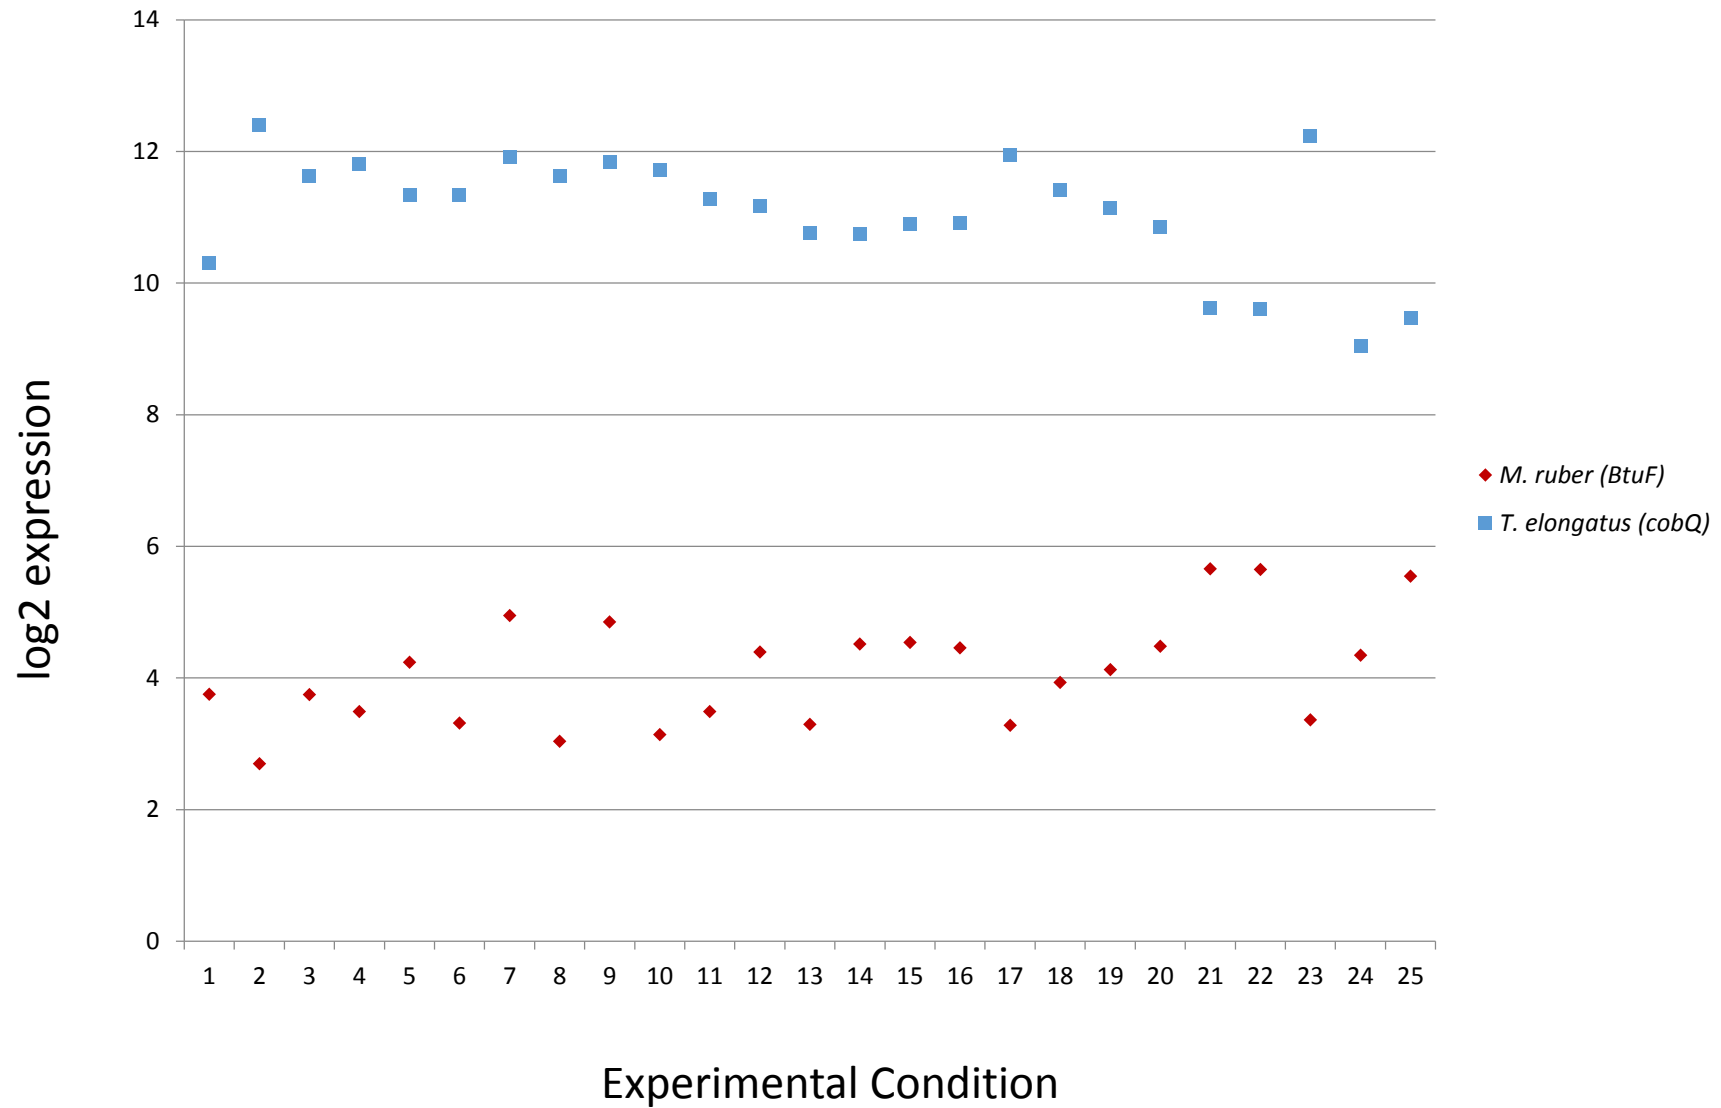

Supplement: 41396_2018_145_MOESM5_ESM.pdf [file 41396_2018_145_MOESM5_ESM.pdf]
